# Supplementary material for: Unclassified low grade spindle cell sarcoma with storiform pattern characterized by recurrent novel EWSR1/FUS-NACC1 fusions
Source: Springer Nature journal article supplement (doi:10.1038/s41379-021-00805-x), 2021-04-15
Supplement: 41379_2021_805_MOESM1_ESM.pdf [file 41379_2021_805_MOESM1_ESM.pdf]

**Supplementary Table 1: Custom BAC probes used for fluorescence in situ hybridization (FISH)**

| <b>BAC clones</b>  | <b>cytobands</b> | <b>genes</b> | <b>GP-starting</b> | <b>GP-ending</b> |
|--------------------|------------------|--------------|--------------------|------------------|
| <b>RP11-261H5</b>  | 16p11.2          | C-FUS        | 31213239           | 31400225         |
| <b>RP11-101P23</b> | 16p11.2          | C-FUS        | 31400228           | 31565109         |
| <b>RP11-58G23</b>  | 16p11.2          | C-FUS        | 31567733           | 31769757         |
| <b>RP11-75J11</b>  | 16p11.2          | T-FUS        | 30663929           | 30840589         |
| <b>RP11-717K18</b> | 19p13.2          | C-NACC1      | 13265136           | 13427691         |
| <b>RP11-97B10</b>  | 19p13.2          | C-NACC1      | 13444980           | 13595109         |
| <b>RP11-148D11</b> | 19p13.2          | T-NACC1      | 13003895           | 13178552         |

BAC, bacterial artificial chromosome; GP, genomic position (GRCh37/hg19 assembly); T, telomeric; C, centromeric

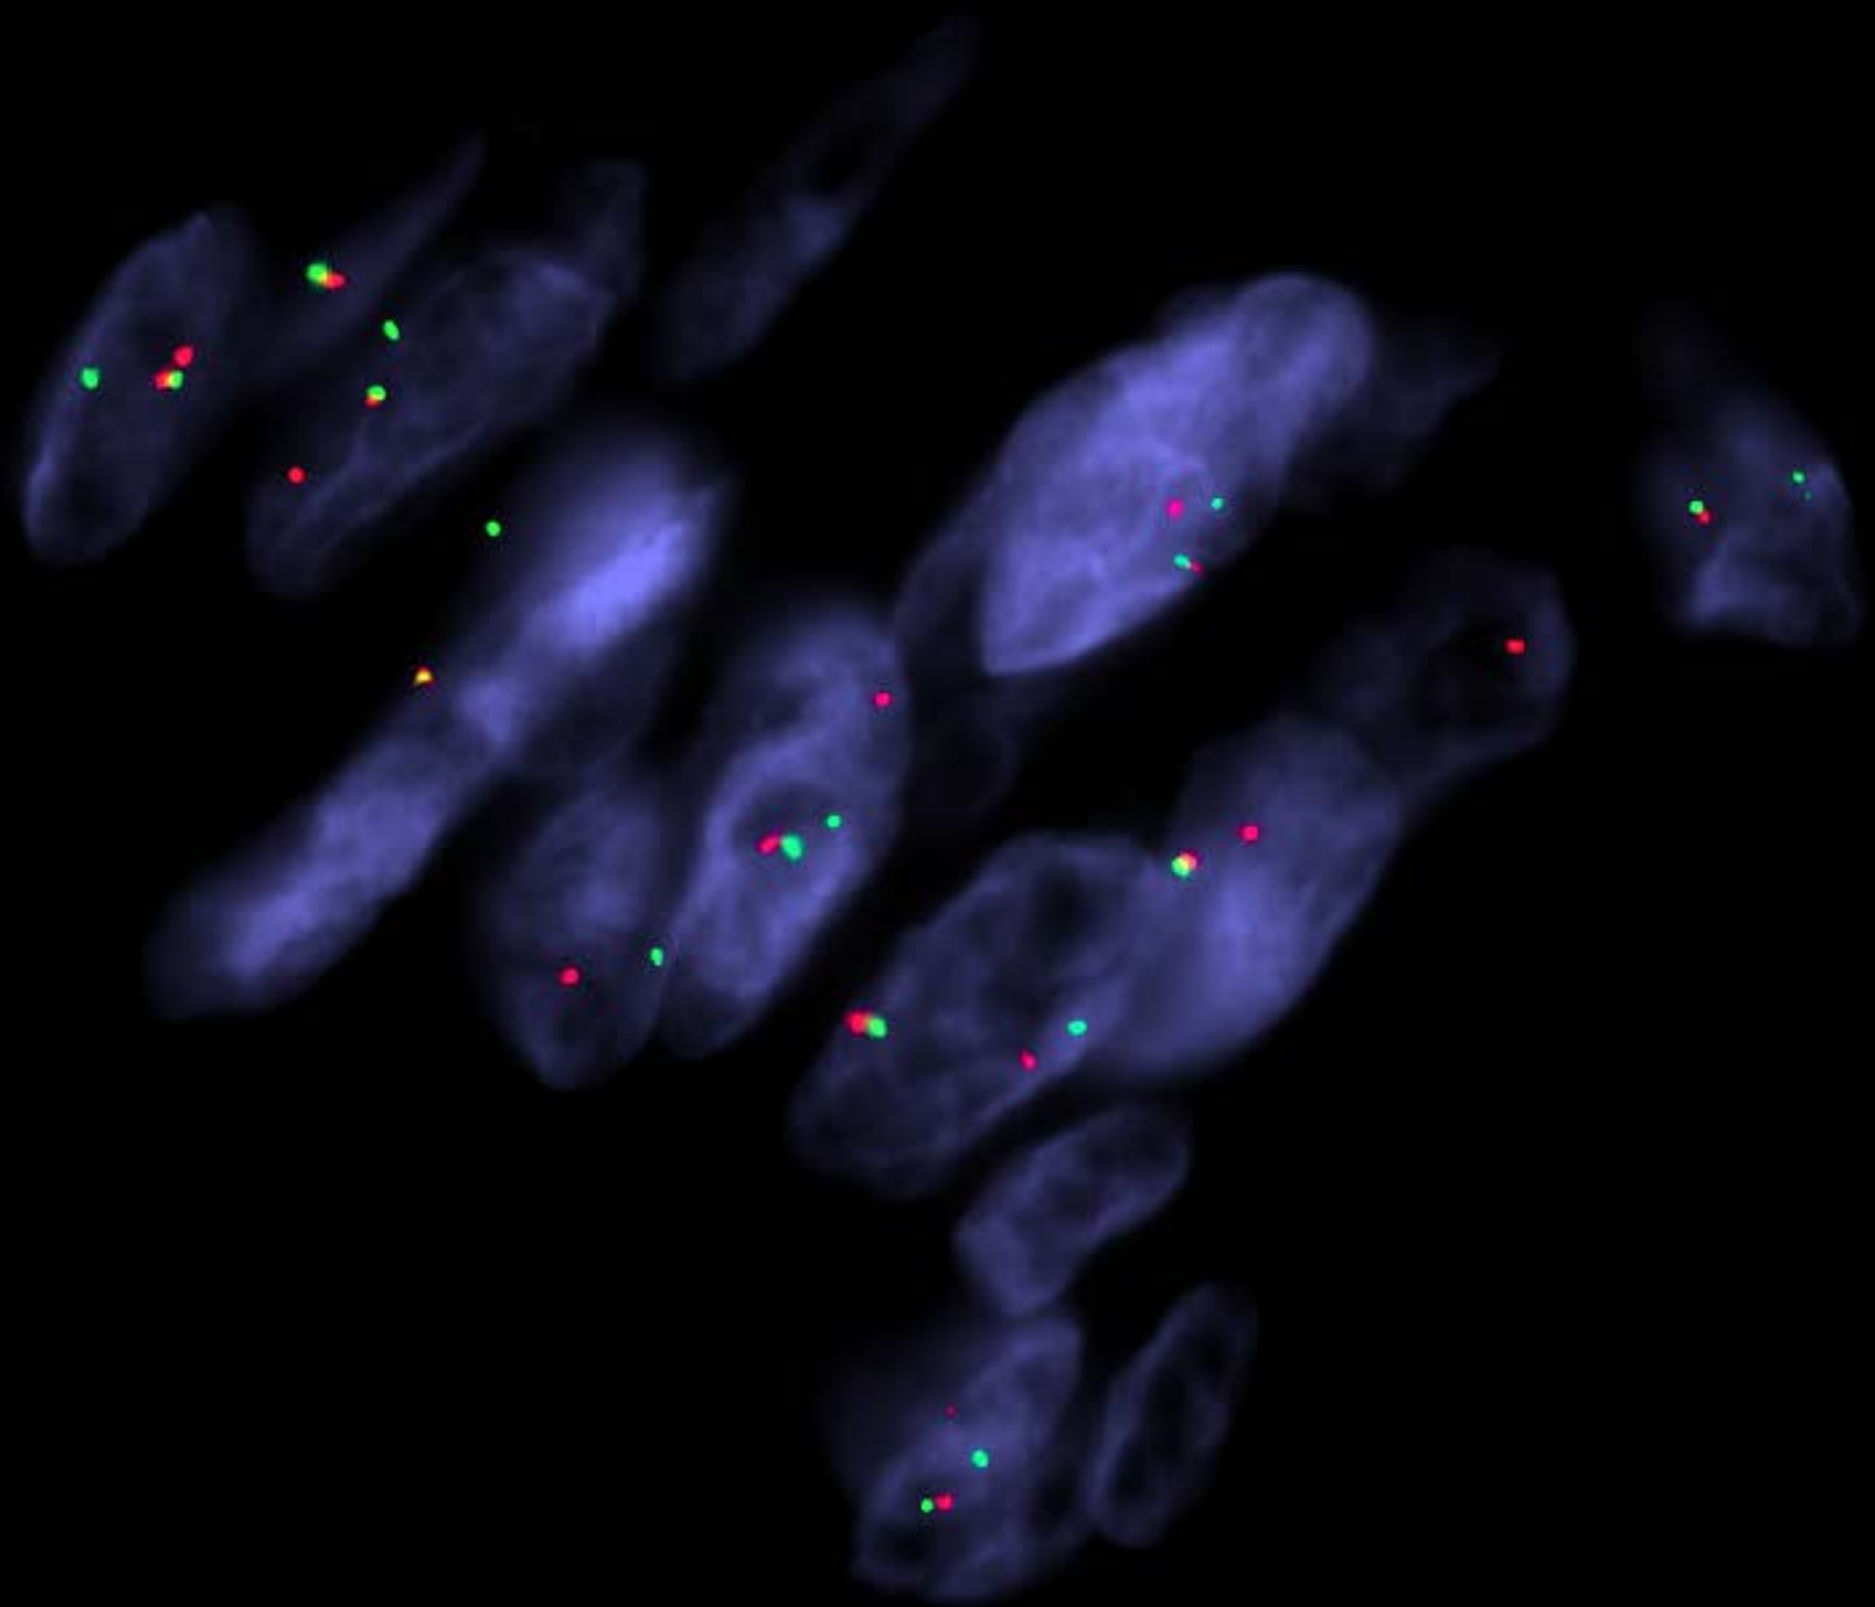

**Supplementary Figure 1:** Dual-color fusion assay FISH showing merged red and green signals in keeping with a *FUS-NACCI* fusion (green, telomeric, *FUS*; red, centromeric *NACCI*).
